# Supplementary material for: Protein interaction networks in the vasculature prioritize genes and pathways underlying coronary artery disease
Source: PubMed Central journal article supplement (PMC10786878; doi:10.1038/s42003-023-05705-1), 2024-01-12
Supplement: 42003_2023_5705_MOESM2_ESM.pdf [file 42003_2023_5705_MOESM2_ESM.pdf]

## Description of Additional Supplementary File

**File name:** Supplementary Data 1

**Description:** Source data for main and supplementary figures.

**File name:** Supplementary Data 2

**Description:** Pooled CAD-risk loci from genetic association studies.

**File name:** Supplementary Data 3

**Description:** Index gene expression in HAEC and HCASMC.

**File name:** Supplementary Data 4

**Description:** Genetic and experimental evidence implicating the index genes in CAD.

**File name:** Supplementary Data 5

**Description:** Analysis results for the 20 IP-MS datasets that passed QC.

**File name:** Supplementary Data 6

**Description:** Summary of the 20 IP-MS datasets that passed QC.

**File name:** Supplementary Data 7

**Description:** GO term enrichment analysis of JCAD interactors in EC.

**File name:** Supplementary Data 8

**Description:** Summary of interactors and non-interactors in the PPI networks.

**File name:** Supplementary Data 9

**Description:** Overlap of interactors between each pair of IP-MS datasets.

**File name:** Supplementary Data 10

**Description:** Tissue enrichment of the PPI networks calculated using GTEx tissue-specific genes.

**File name:** Supplementary Data 11

**Description:** Enrichment of MSigDB Hallmark and Reactome gene sets in the PPI networks.

**File name:** Supplementary Data 12

**Description:** Enrichment of GO MF, CC, and BP terms in the PPI networks.

**File name:** Supplementary Data 13

**Description:** Common variant enrichment of the PPI networks calculated using MAGMA and GWAS summary statistics.

**File name:** Supplementary Data 14

**Description:** Protein interactions between index genes and genes in CAD GWAS loci.

**File name:** Supplementary Data 15

**Description:** Overlap between CAD PPI data from this study and CRISPR screen data from Wunnemann et al.
